# Supplementary material for: Supramolecular Cu(ii)–dipyridyl frameworks featuring weakly coordinating dodecaborate dianions for selective gas separation
Source: Royal Society of Chemistry journal article supplement (doi:10.1039/d0ce01395a), 2020-11-25
Supplement: d0ce01395a1.pdf [file d0ce01395a1.pdf]

## Supplementary Information

# **“Supramolecular Cu(II)–dipyridyl frameworks featuring weakly coordinating dodecaborate dianions for selective gas separation”**

Lingyao Wang,<sup>ac</sup> Tao Jiang,<sup>b</sup> Simon Duttwyler,<sup>c</sup> Yuanbin Zhang<sup>a\*</sup>

---

<sup>a</sup> *Key Laboratory of the Ministry of Education for Advanced Catalysis Materials, College of Chemistry and Life Sciences, Zhejiang Normal University, Jinhua 321004, China. E-mail: [ybzhang@zju.edu.cn](mailto:ybzhang@zju.edu.cn)*

<sup>b</sup> *Department of Pharmacy, Jiangxi University of Traditional Chinese Medicine, Nanchang, 330004, China*

<sup>c</sup> *Department of Chemistry, Zhejiang University, Hangzhou 310027, China*

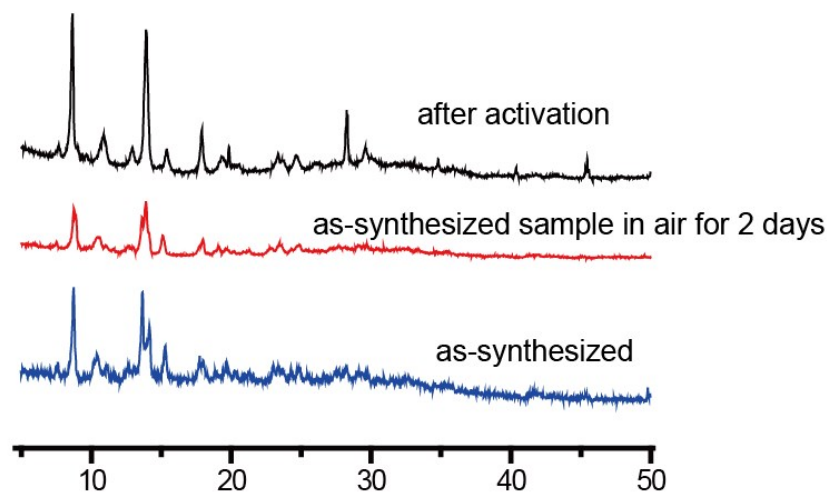

**Fig. S1** PXR D patterns of BSF-74b. It is different from the predicted PXR D patterns from the crystal structure of BSF-74.

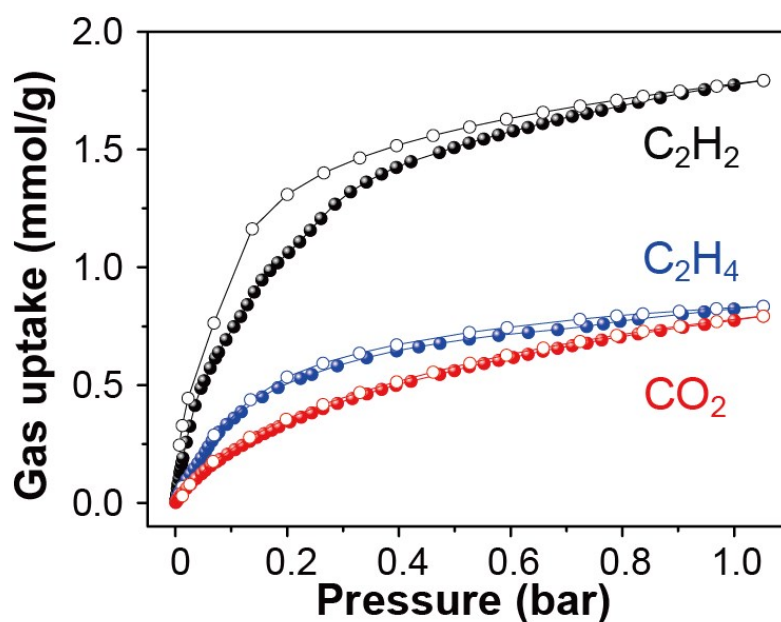

**Fig. S2** C<sub>2</sub>H<sub>2</sub>, CO<sub>2</sub> and C<sub>2</sub>H<sub>4</sub> adsorption and desorption isotherms on activated BSF-74b at 273 K

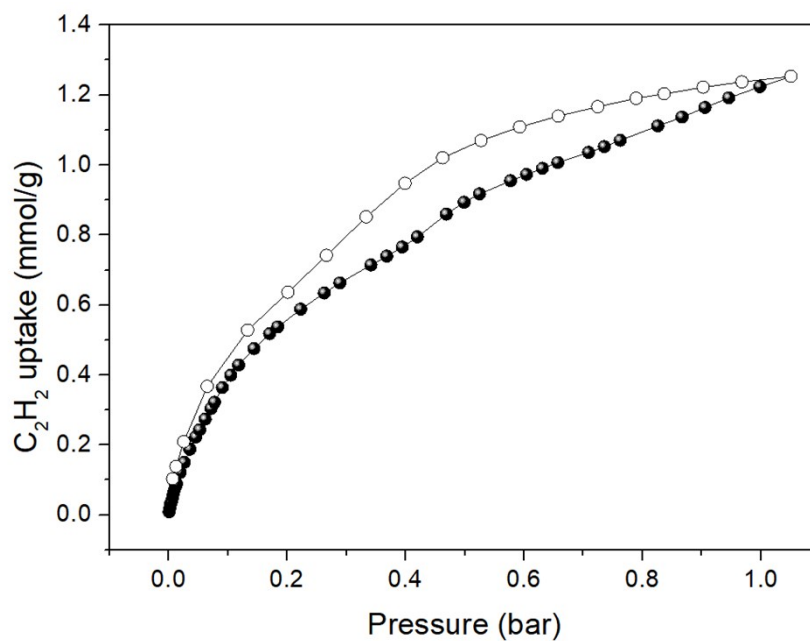

**Fig. S3** C<sub>2</sub>H<sub>2</sub> adsorption and desorption isotherms on activated BSF-74b at 298 K after exposure in humid air for 1 day

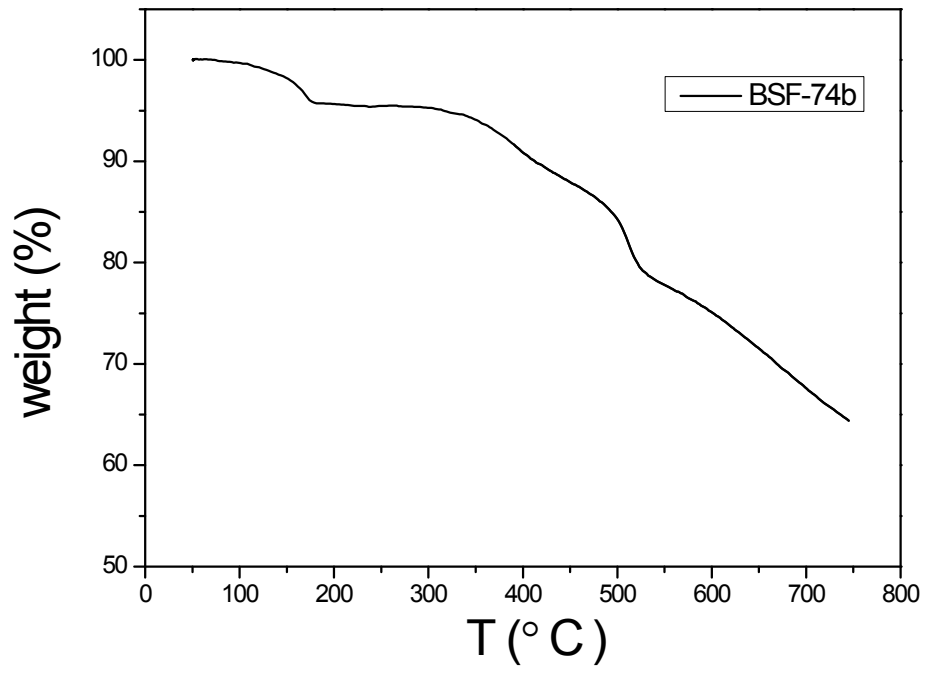

**Fig. S4** TGA curves of BSF-74b

**Table S1** Summary of gas adsorption properties and C<sub>2</sub>H<sub>2</sub>/CO<sub>2</sub> selectivities of the reported MOFs.<sup>[a]</sup>

| Materials                    | C <sub>2</sub> H <sub>2</sub><br>(mmol/g) | CO <sub>2</sub><br>(mmol/g) | V <sub>C<sub>2</sub>H<sub>2</sub>/CO<sub>2</sub></sub> | S    | Ref                                                                  |
|------------------------------|-------------------------------------------|-----------------------------|--------------------------------------------------------|------|----------------------------------------------------------------------|
| UTSA-300a                    | 3.08                                      | 0.15                        | 20.53                                                  | 743  | <i>J. Am. Chem. Soc.</i> <b>2017</b> , <i>139</i> , 8022-8028        |
| Cu-CPAH                      | 5.88                                      | 3.93                        | 1.50                                                   | 3.6  | <i>ACS Appl. Mater. Inter.</i> <b>2020</b> , <i>12</i> , 5999-6006   |
| ZJNU-13                      | 5.29                                      | 3.92                        | 1.35                                                   | 5.6  | <i>ACS Appl. Nano Mater.</i> <b>2020</b> , <i>3</i> , 2911-2919.     |
| FeNi-M'MOF                   | 4.29                                      | 2.72                        | 1.58                                                   | 24   | <i>Angew. Chem.</i> <b>2020</b> , <i>59</i> , 4396-4400              |
| JCM-1                        | 3.35                                      | 1.7                         | 1.97                                                   | 13.7 | <i>Angew. Chem.</i> <b>2018</b> , <i>57</i> , 7869-7873              |
| SNNU-45                      | 5.98                                      | 4.35                        | 1.37                                                   | 10.8 | <i>Angew. Chem.</i> <b>2019</b> , <i>58</i> , 13590-13595            |
| TIFSIX-2-Ni-i <sup>[b]</sup> | 4.21                                      | 4.54                        | 0.93                                                   | 6.2  | <i>Chem. Eng. J.</i> <b>2018</b> , <i>352</i> , 803-810              |
| TIFSIX-2-Cu-i <sup>[b]</sup> | 4.1                                       | 4.3                         | 0.95                                                   | 6.5  | <i>Chem</i> <b>2016</b> , <i>1</i> , 753-765                         |
| NKMOF-1-Ni                   | 2.72                                      | 2.28                        | 1.19                                                   | 25   | <i>Angew. Chem.</i> <b>2018</b> , <i>130</i> , 11137-11141           |
| ZJUT-2a                      | 3.39                                      | 2.19                        | 1.55                                                   | 10   | <i>Chem. Commun.</i> <b>2019</b> , <i>55</i> , 11354-11357           |
| FJU-89a                      | 4.53                                      | 2.73                        | 1.66                                                   | 4.3  | <i>ACS Appl. Mater. Inter.</i> <b>2018</b> , <i>10</i> , 30912-30918 |
| TCuI                         | 2.2                                       | 1.6                         | 1.38                                                   | 5.3  |                                                                      |
| TCuBr                        | 2.8                                       | 2                           | 1.40                                                   | 9.5  | <i>Chem. Eur. J.</i> <b>2020</b> , <i>26</i> , 43923-4929.           |
| TCuCl                        | 3                                         | 2                           | 1.50                                                   | 16.9 |                                                                      |

|                                        |      |      |      |      |                                                                                    |
|----------------------------------------|------|------|------|------|------------------------------------------------------------------------------------|
| MUF-17 <sup>[c]</sup>                  | 2.73 | 2.28 | 1.20 | 6.01 | <i>Chem. Mater.</i> <b>2019</b> , <i>31</i> ,<br>4919-4926                         |
| JXNU-5a                                | 2.5  | 1.55 | 1.61 | 5    | <i>Inorg. Chem.</i> <b>2019</b> , <i>58</i> ,<br>5089-5095                         |
| SNNU-150-Al                            | 4.33 | 1.98 | 2.19 | 7.27 |                                                                                    |
| SNNU-150-Ga                            | 1.78 | 1.19 | 1.50 | 4.93 | <i>Inorg. Chem.</i> <b>2020</b> , <i>59</i> ,<br>4825-4834                         |
| SNNU-150-In                            | 1.56 | 1.03 | 1.51 | 5.57 |                                                                                    |
| UTSA-50a <sup>[d]</sup>                | 5.08 | 2.88 | 1.76 | 13.3 | <i>J. Mater. Chem. A</i><br><b>2013</b> , <i>1</i> , 77-81.                        |
| UTSA-74a <sup>[d]</sup>                | 4.83 | 3.17 | 1.52 | 9    | <i>J. Am. Chem. Soc.</i><br><b>2016</b> , <i>138</i> , 5678-5684.                  |
| FJU-90                                 | 8.03 | 4.6  | 1.75 | 4.3  | <i>J. Am. Chem. Soc.</i><br><b>2019</b> , <i>141</i> ,<br>4130-4136.               |
| SNNU-65-Cu-Sc                          | 7.99 | 3.14 | 2.54 | 13.5 |                                                                                    |
| SNNU-65-Cu-Fe                          | 7.25 | 2.9  | 2.50 | 6.7  | <i>Chem. Commun.</i> <b>2018</b> ,<br><i>54</i> , 2012-<br>2015.                   |
| SNNU-65-Cu-Ga                          | 6.32 | 2.62 | 2.41 | 18.7 |                                                                                    |
| SNNU-65-Cu-In                          | 6.84 | 2.5  | 2.74 | 7    |                                                                                    |
| FJU-6-TATB <sup>[d]</sup>              | 4.91 | 2.59 | 1.90 | 3.1  | <i>J. Am. Chem. Soc.</i><br><b>2020</b> , <i>142</i> , 9258-9266                   |
| UPC-110                                | 3.28 | 1.08 | 3.04 | 5.1  | <i>ACS Sustainable Chem.</i><br><i>Eng.</i> <b>2019</b> , <i>7</i> , 2134-<br>2140 |
| CPM-107op                              | 4.35 | 1.56 | 2.79 | 5.7  | <i>Angew. Chem.</i> <b>2019</b> ,<br><i>58</i> , 11757-11762                       |
| PCM-48 <sup>[d]</sup>                  | 1.14 | 0.97 | 1.18 | 4.3  | <i>Chem. Commun.</i> <b>2018</b> ,<br><i>54</i> , 9937-9940.                       |
| [Ni <sub>3</sub> (HCOO) <sub>6</sub> ] | 2.38 | 1.73 | 1.38 | 22   | <i>ACS Sustainable Chem.</i><br><i>Eng.</i> <b>2019</b> , <i>7</i> , 1667-         |

|                            |      |      |      |      |                                                             |
|----------------------------|------|------|------|------|-------------------------------------------------------------|
| UTSA-83                    | 0.53 | 0.17 | 3.12 | 6.2  | <i>Inorg. Chim. Acta</i> <b>2019</b> , 495, 118938          |
| BSF-1                      | 2.35 | 1.77 | 1.33 | 3.4  |                                                             |
| BSF-2                      | 1.85 | 1.33 | 1.39 | 5.1  | <i>Angew. Chem.</i> <b>2020</b> , 59, 17664-17669           |
| BSF-3                      | 3.65 | 2.11 | 1.73 | 16.3 |                                                             |
| HOF-3a <sup>[d]</sup>      | 2.1  | 0.94 | 2.23 | 21   | <i>Angew. Chem.</i> <b>2015</b> , 54, 574-577               |
| DICRO-4-Ni-i               | 1.92 | 1.03 | 1.86 | 13.9 | <i>ACS Appl. Mater. Inter.</i> <b>2017</b> , 9, 33395-33400 |
| ECUT-HOF-30 <sup>[d]</sup> | 1.95 | 0.4  | 4.88 | 9    | <i>Chem. Eng. J.</i> <b>2019</b> , 123117                   |
| BSF-74b                    | 1.58 | 0.5  | 3.16 | 9.7  | <i>This work</i>                                            |

[a] all conditions are under 298 K and 1 bar, equimolar selectivity unless stated; [b] C<sub>2</sub>H<sub>2</sub>/CO<sub>2</sub> = 2:1; [c] 293 K; [d] 296 K.

**Table S2** Summary of gas adsorption properties and C<sub>2</sub>H<sub>2</sub>/C<sub>2</sub>H<sub>4</sub> selectivities of the reported MOFs.<sup>[a]</sup>

| Materials                | C <sub>2</sub> H <sub>2</sub><br>(mmol/g) | C <sub>2</sub> H <sub>4</sub><br>(mmol/g) | V <sub>C<sub>2</sub>H<sub>2</sub>/C<sub>2</sub>H<sub>4</sub></sub> | S                  | Ref                                                      |
|--------------------------|-------------------------------------------|-------------------------------------------|--------------------------------------------------------------------|--------------------|----------------------------------------------------------|
| M'-MOF-3a <sup>[b]</sup> | 1.88                                      | 0.4                                       | 4.73                                                               | 24.03              | <i>Nat Commun</i> <b>2011</b> , 2, 204                   |
| UTSA-100a <sup>[b]</sup> | 4.27                                      | 1.66                                      | 2.57                                                               | 10.7               | <i>Nat. Commun</i> <b>2015</b> , 6, 7328                 |
| NOTT-300 <sup>[c]</sup>  | 6.34                                      | 4.28                                      | 1.48                                                               | 2.2                | <i>Nat. Chem.</i> <b>2014</b> , 7, 121–129               |
| MOF-74-Co <sup>[b]</sup> | 8.17                                      | 7.02                                      | 1.16                                                               | 1.70               | <i>Energ. Environ. Sci.</i> <b>2012</b> , 5, 9107        |
| JCM-1                    | 3.35                                      | 1.56                                      | 2.15                                                               | 13.2               | <i>Angew. Chem. Int. Ed.</i> <b>2018</b> , 57, 7869–7873 |
| FJU-22a <sup>[b]</sup>   | 5.13                                      | 3.83                                      | 1.34                                                               |                    | <i>Chem. - Eur. J.</i> <b>2016</b> , 22, 5676–5683       |
| NKMOF-1-Ni               | 2.72                                      | 2.11                                      | 1.29                                                               | ~20 <sup>[d]</sup> | <i>Angew. Chem. Int. Ed.</i> <b>2018</b> ,               |

|                       |      |      |      |                     |                                                               |
|-----------------------|------|------|------|---------------------|---------------------------------------------------------------|
| PCP-33                | 5.44 | 3.88 | 1.40 | ~1.2                | <i>Inorg. Chem.</i> <b>2015</b> , <i>54</i> , 4279–4284.      |
| SIFSIX-1-Cu           | 8.5  | 3.67 | 2.07 | 10.6 <sup>[e]</sup> |                                                               |
| SIFSIX-2-Cu-i         | 4.02 | 2.19 | 1.84 | 44.8 <sup>[e]</sup> | <i>Science</i> <b>2016</b> , <i>353</i> , 141–144.            |
| SIFSIX-3-Zn           | 3.64 | 2.24 | 1.62 | 8.8 <sup>[e]</sup>  |                                                               |
| UTSA-200a             | 3.65 | 0.63 | 5.79 | >6k <sup>[e]</sup>  | <i>Adv. Mater.</i> <b>2017</b> , <i>29</i> , 1704210          |
| UTSA-300a             | 3.08 | 0.04 | 74.9 | >10 <sup>6</sup>    | <i>J. Am. Chem. Soc.</i> <b>2017</b> , <i>139</i> , 8022–8028 |
| MUF-17 <sup>[c]</sup> | 2.74 | 1.96 | 1.40 | 6.01                | <i>Chem. Mater.</i> <b>2019</b> , <i>31</i> , 4919–4926       |
| BSF-1                 | 2.35 | 1.63 | 1.44 | 2.4                 |                                                               |
| BSF-2                 | 1.85 | 1.32 | 1.40 | 2.9                 | <i>Angew. Chem.</i> <b>2020</b> , <i>59</i> , 17664–17669     |
| BSF-3                 | 3.59 | 2.37 | 1.51 | 8.0                 |                                                               |
| BSF-3-Co              | 3.85 | 2.51 | 1.53 | 10.2                |                                                               |
| BSF-74b               | 1.58 | 0.68 | 2.21 | 5.3                 | This work                                                     |

[a] all conditions are under 298 K and 1 bar, equimolar selectivity unless stated; [b] 296 K; [c] 293 K; [d] selectivity for C<sub>2</sub>H<sub>2</sub>/C<sub>2</sub>H<sub>4</sub> (1/9); [e] selectivity for C<sub>2</sub>H<sub>2</sub>/C<sub>2</sub>H<sub>4</sub> (1/99).



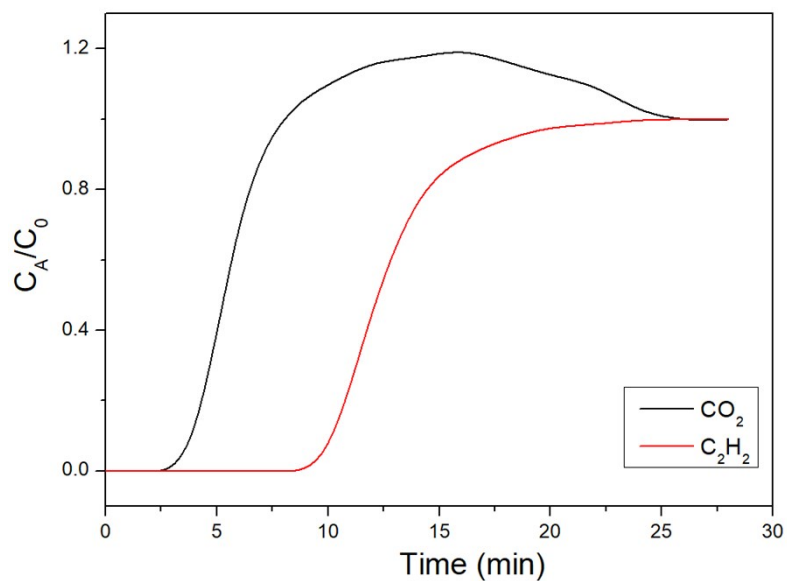

**Fig. S5** Experimental column breakthrough curves for equimolar  $C_2H_2/CO_2$  mixtures (298 K, 1 bar, gas flow: 1 mL/min) in an adsorber bed packed with BSF-74b

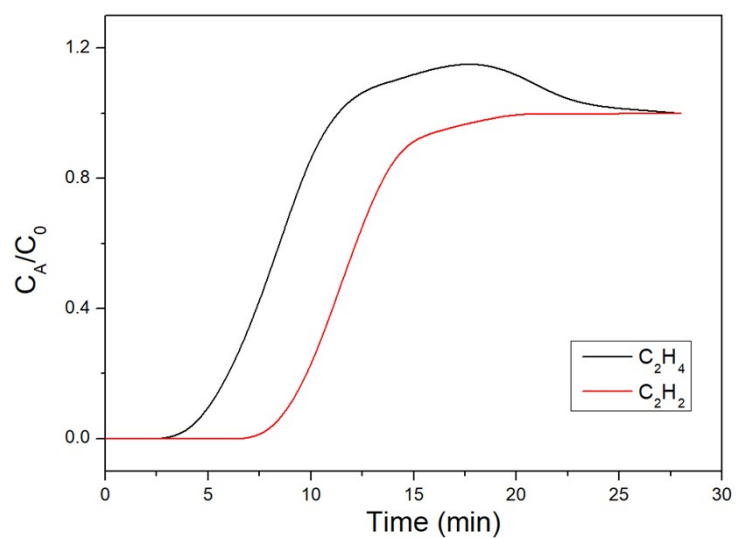

**Fig. S6** Experimental column breakthrough curves for equimolar

$C_2H_2/C_2H_4$  mixtures (298 K, 1 bar, gas flow: 1 mL/min) in an adsorber bed packed with BSF-74b
